# Supplementary material for: Efficacy and safety of anti‐PD‐1/PD‐L1 in combination with chemotherapy or not as first‐line treatment for advanced non‐small cell lung cancer: A systematic review and network meta‐analysis
Source: PubMed Central journal article supplement — Thorac Cancer. 2021 Dec 14;13(3):322–37. doi: 10.1111/1759-7714.14244 (PMC8807232; doi:10.1111/1759-7714.14244), 2021-12-14
Supplement: TCA-13-322-s002.pdf [file TCA-13-322-s002.pdf]

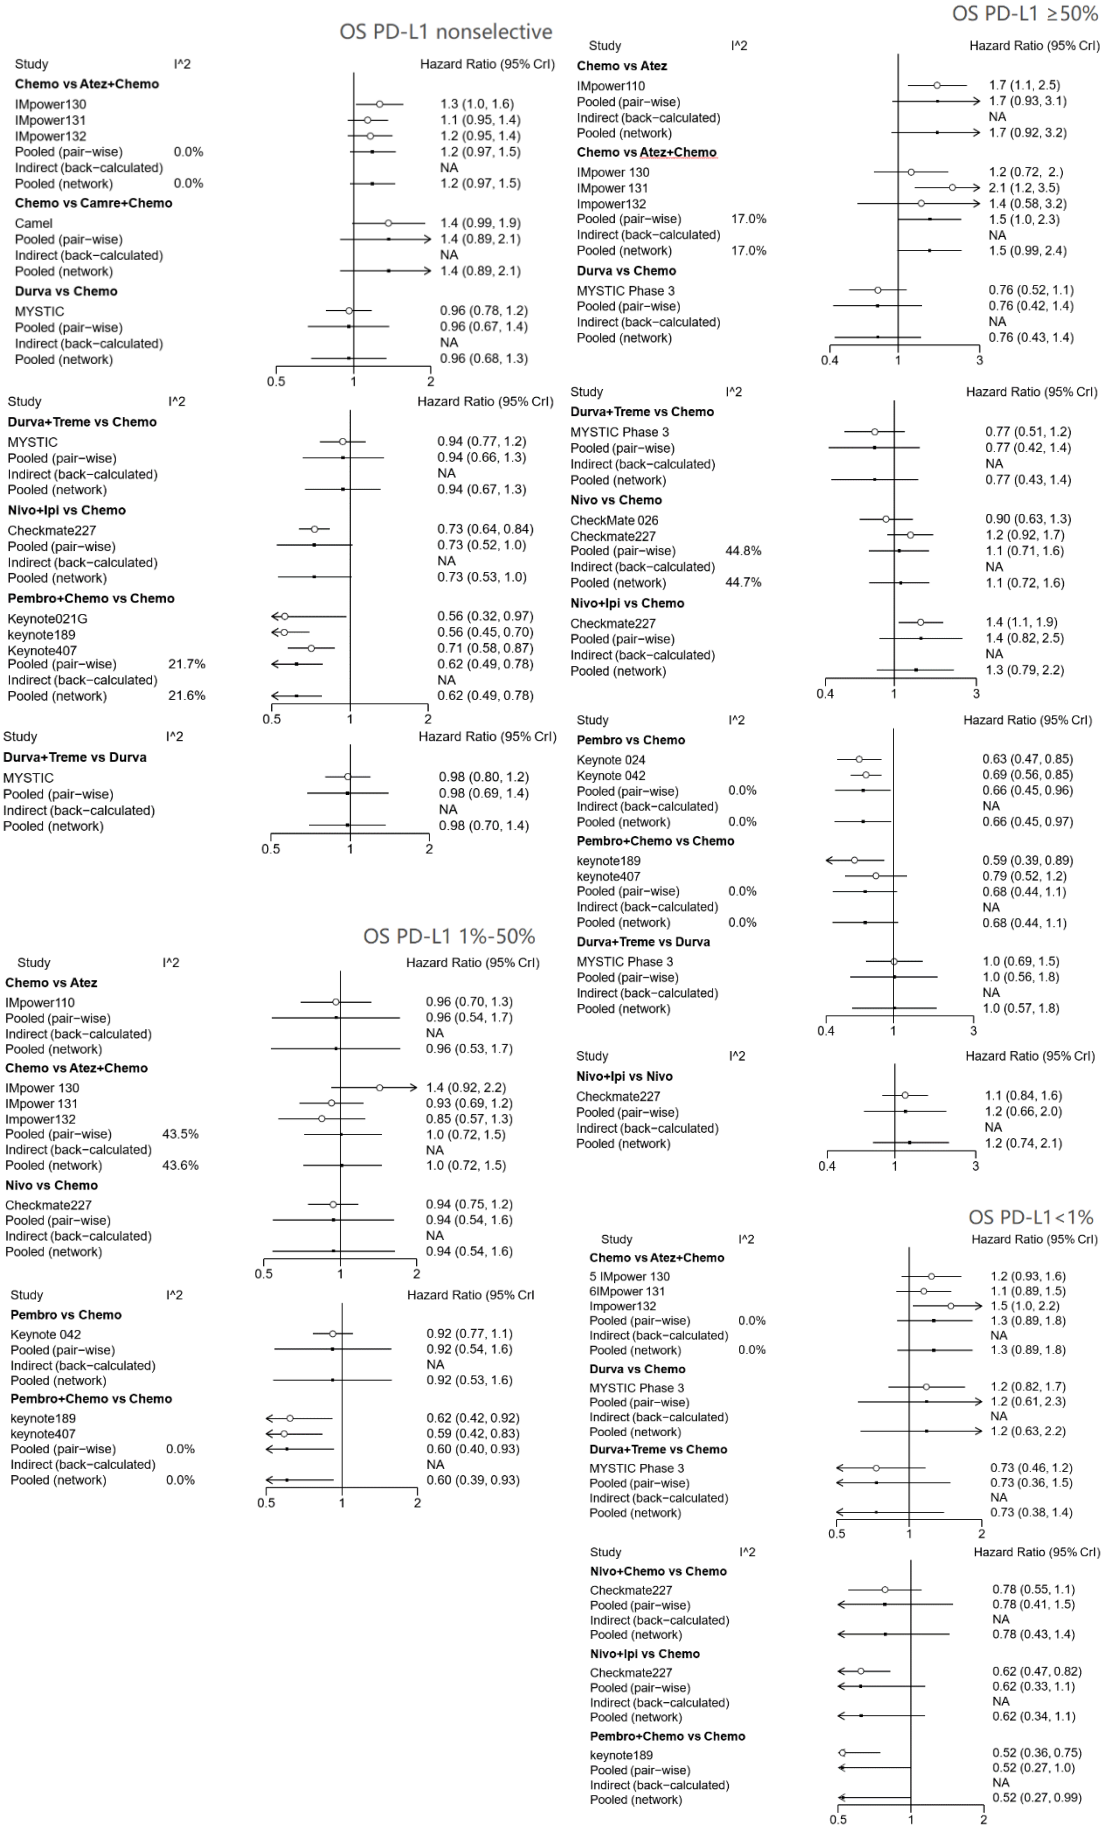

### OS non-squamous

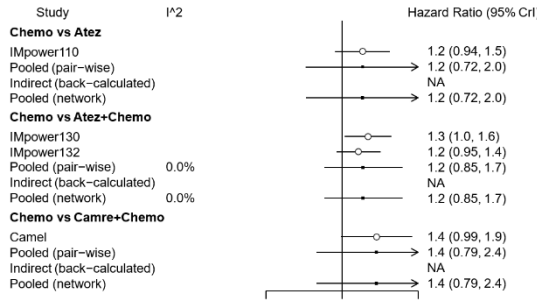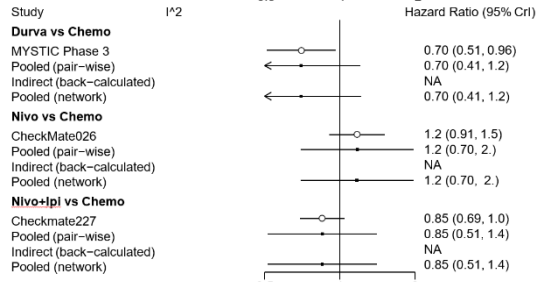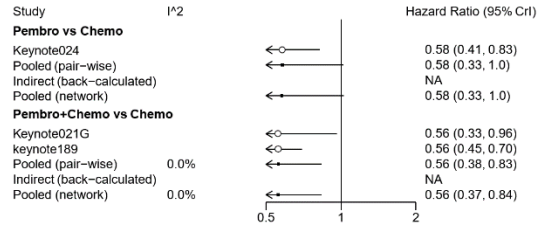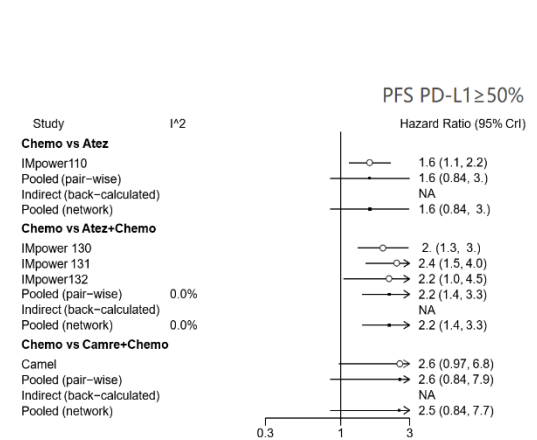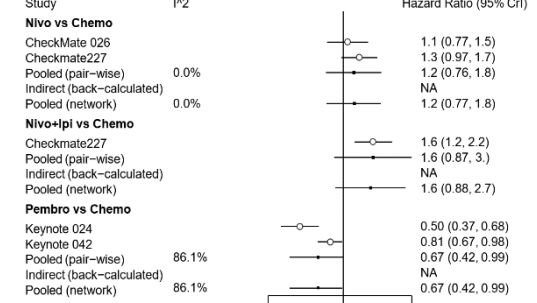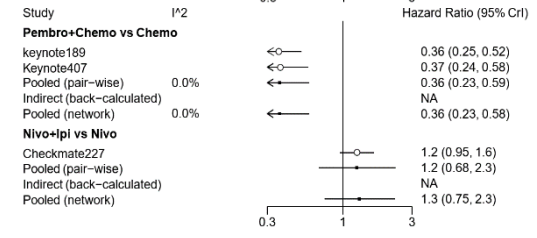

### PFS PD-L1 nonselective

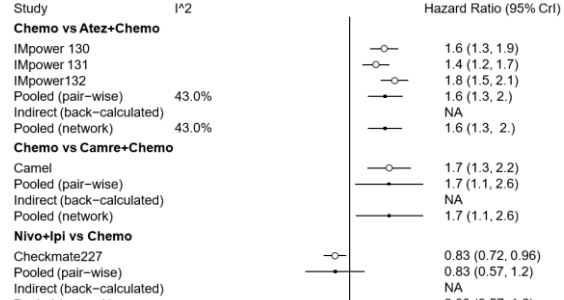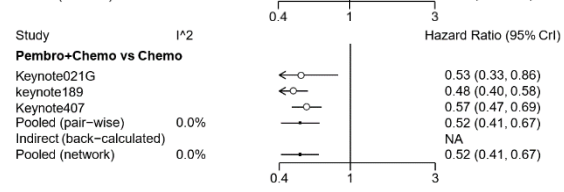

### PFS PD-L1 1%-50%

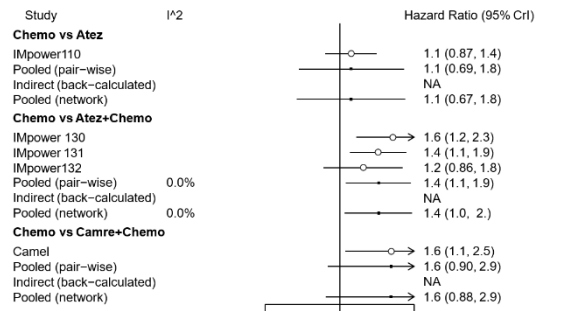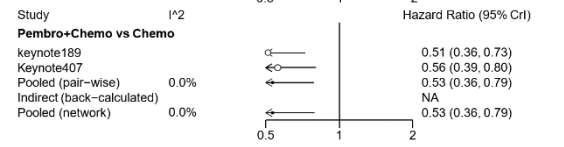

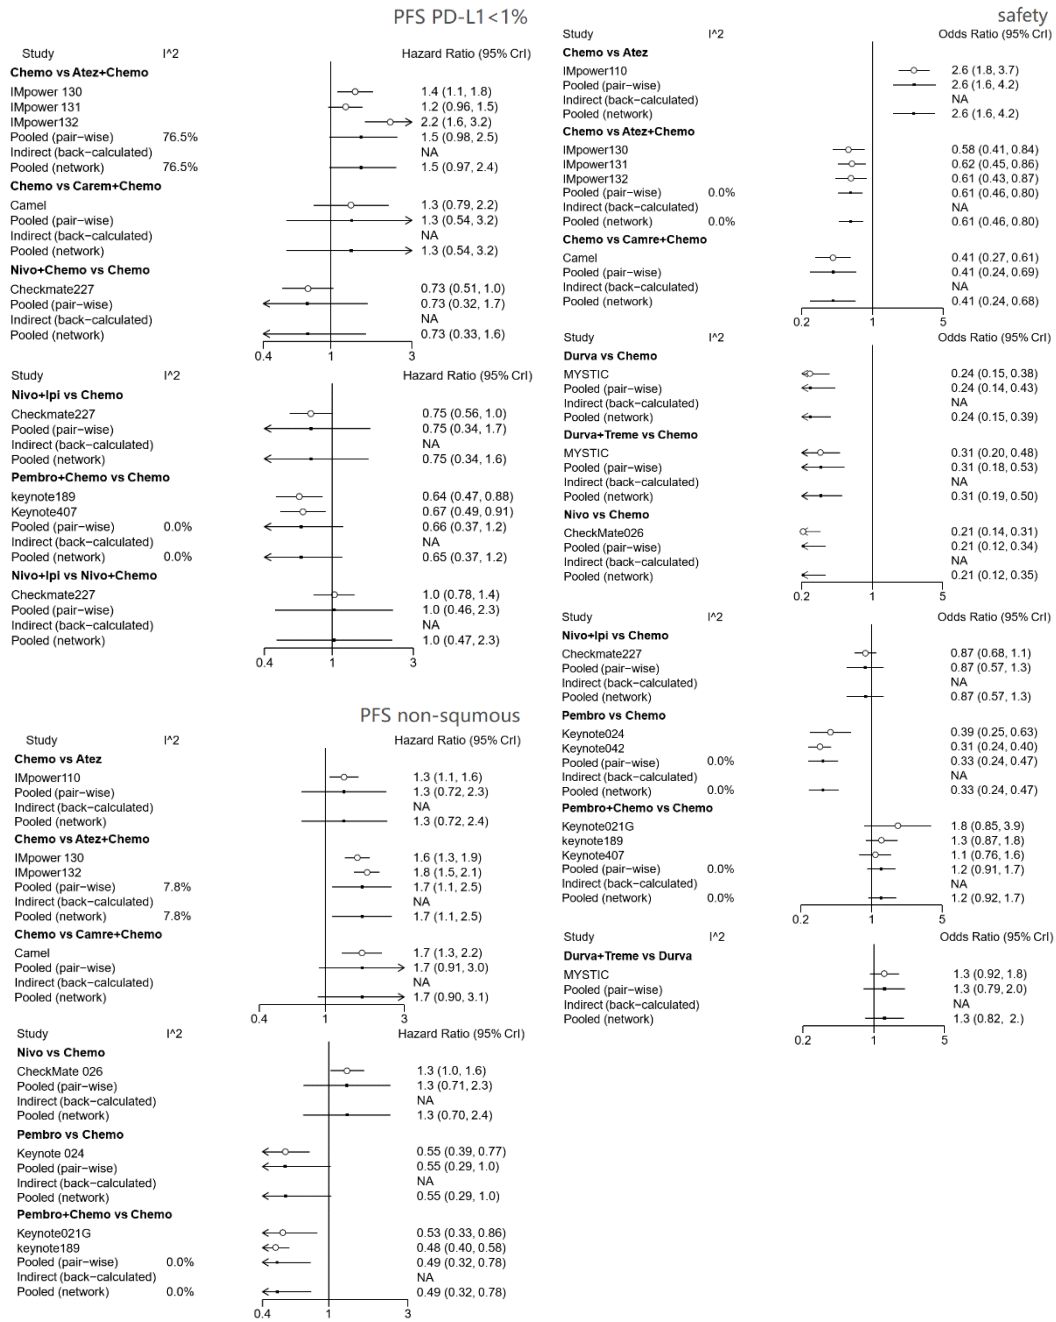

Figure\_1\_Supp Forest plots of heterogeneity analysis. Atez, Atezolizumab; Camre, Camrelizumab; Chemo, Chemotherapy; Durva, Durvalumab; Nivo, Nivolumab; Pembro, Pembrolizumab; Treme, Tremelimumab; Ipi, Ipilimumab
