# Supplementary material for: Efficacy and safety of anti‐PD‐1/PD‐L1 in combination with chemotherapy or not as first‐line treatment for advanced non‐small cell lung cancer: A systematic review and network meta‐analysis
Source: PubMed Central journal article supplement — Thorac Cancer. 2021 Dec 14;13(3):322–37. doi: 10.1111/1759-7714.14244 (PMC8807232; doi:10.1111/1759-7714.14244), 2021-12-14
Supplement: TCA-13-322-s004.pdf [file TCA-13-322-s004.pdf]

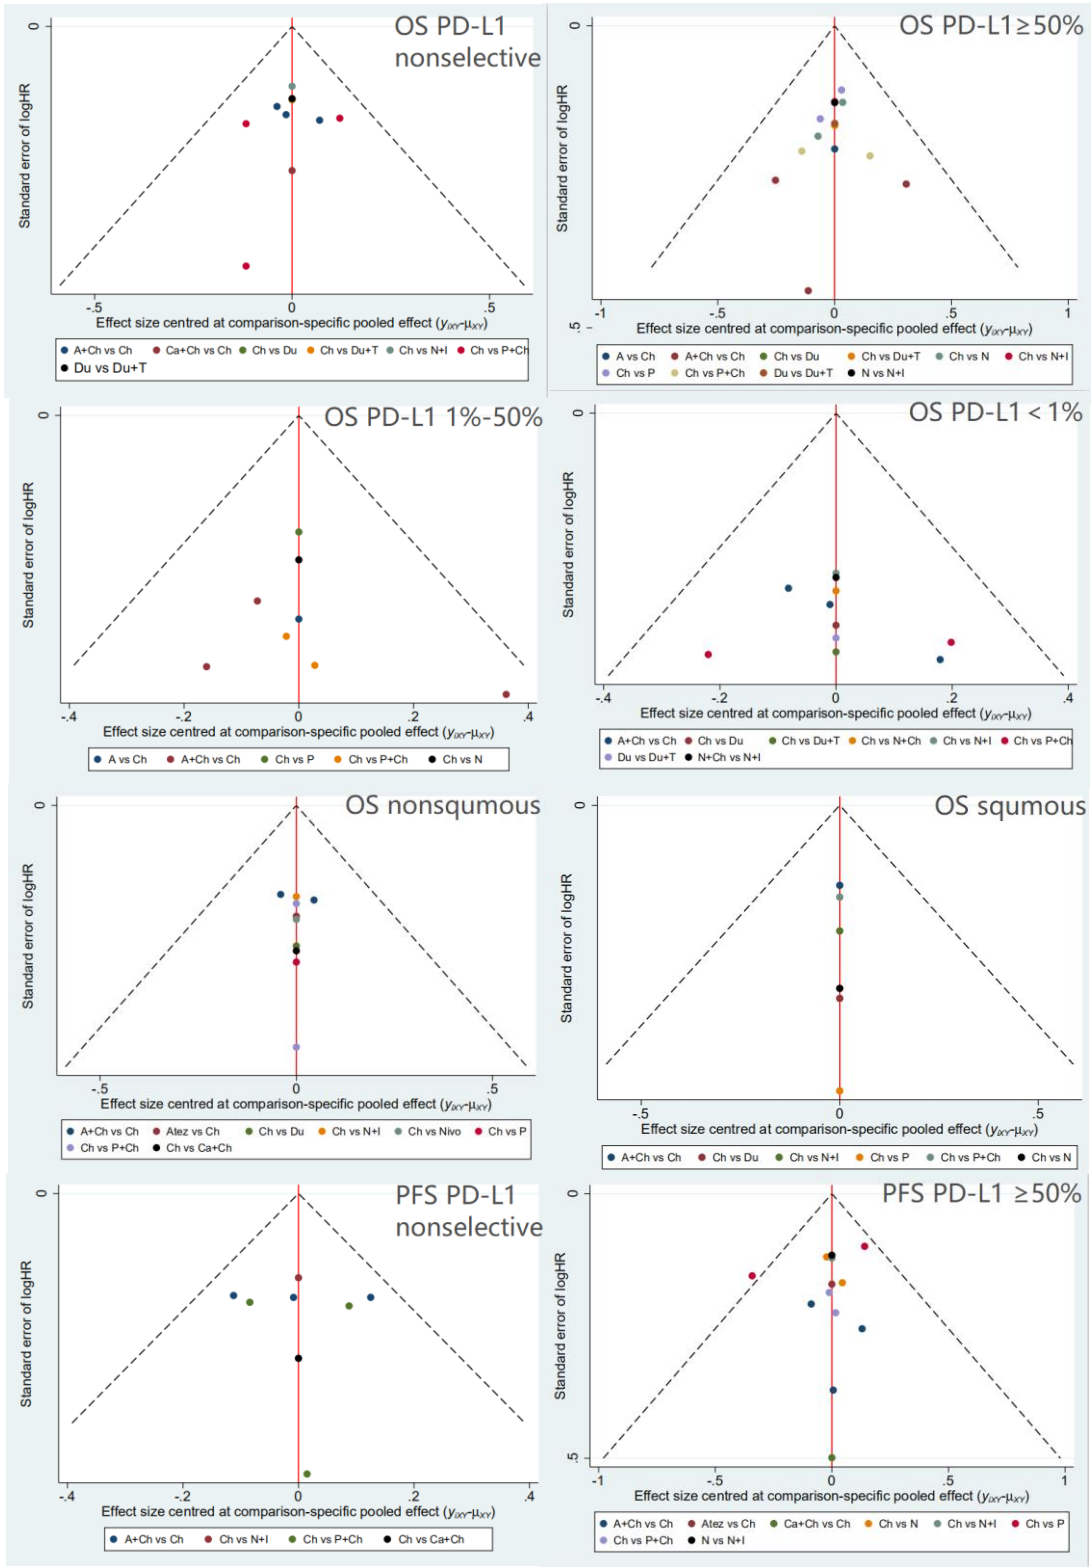

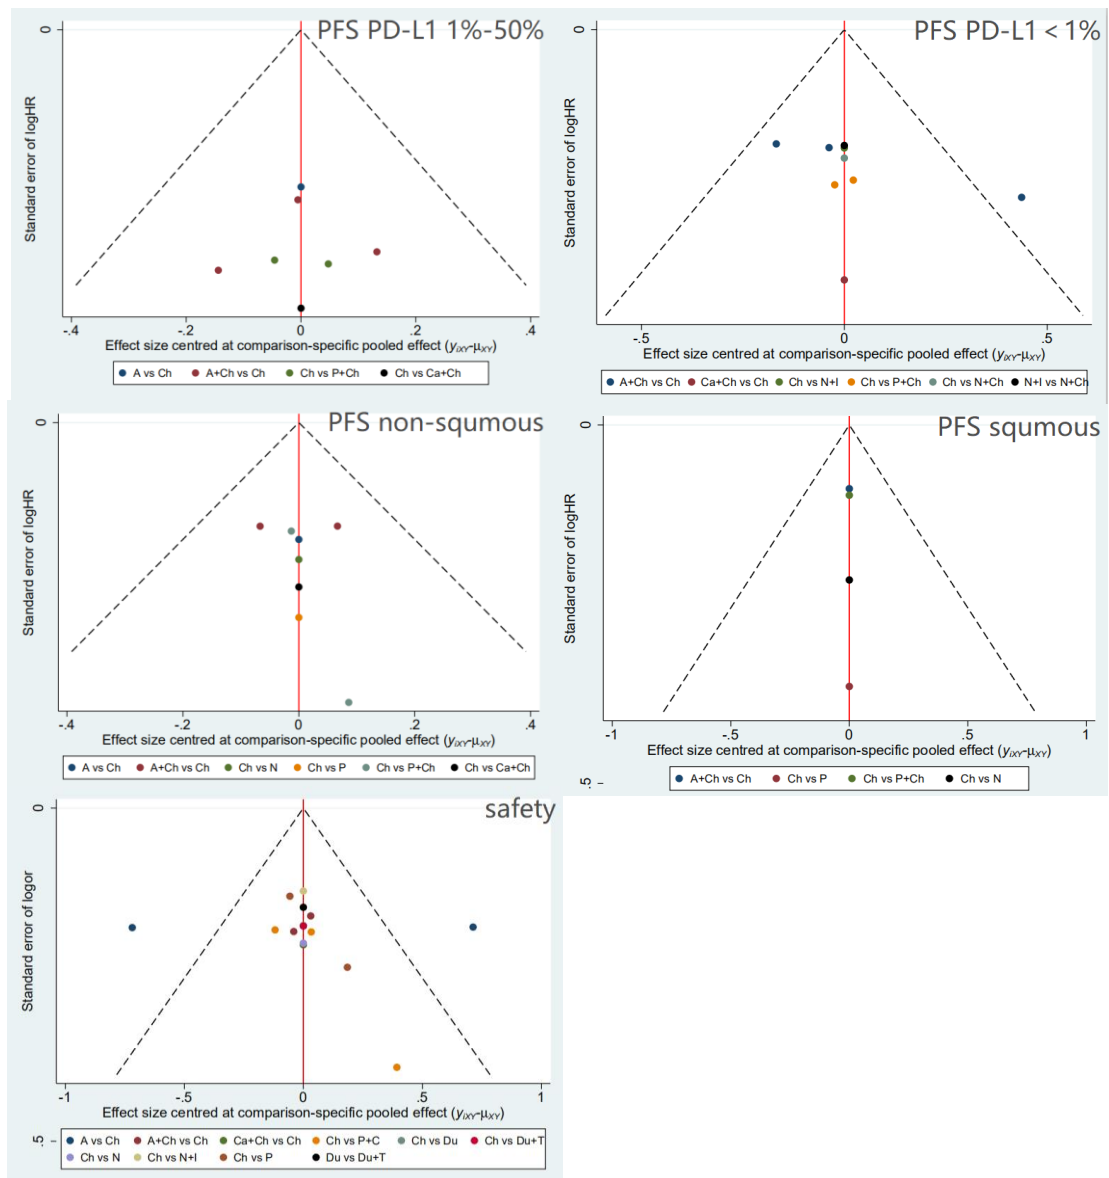

Figure\_2\_Supp Funnel plots of publication bias. A, Atezolizumab; C/Ca, Camrelizumab; Ch, Chemotherapy; Du, Durvalumab; N/Nivo, Nivolumab; P, Pembrolizumab; T, Tremelimumab; I, Ipilimumab
